# Supplementary material for: Dietary magnesium supplementation improves lifespan in a mouse model of progeria
Source: PubMed Central journal article supplement (PMC7539193; doi:10.15252/emmm.202012423), 2020-08-16
Supplement: EMMM-12-e12423-s002.pdf [file EMMM-12-e12423-s002.pdf]

## Expanded View Figures

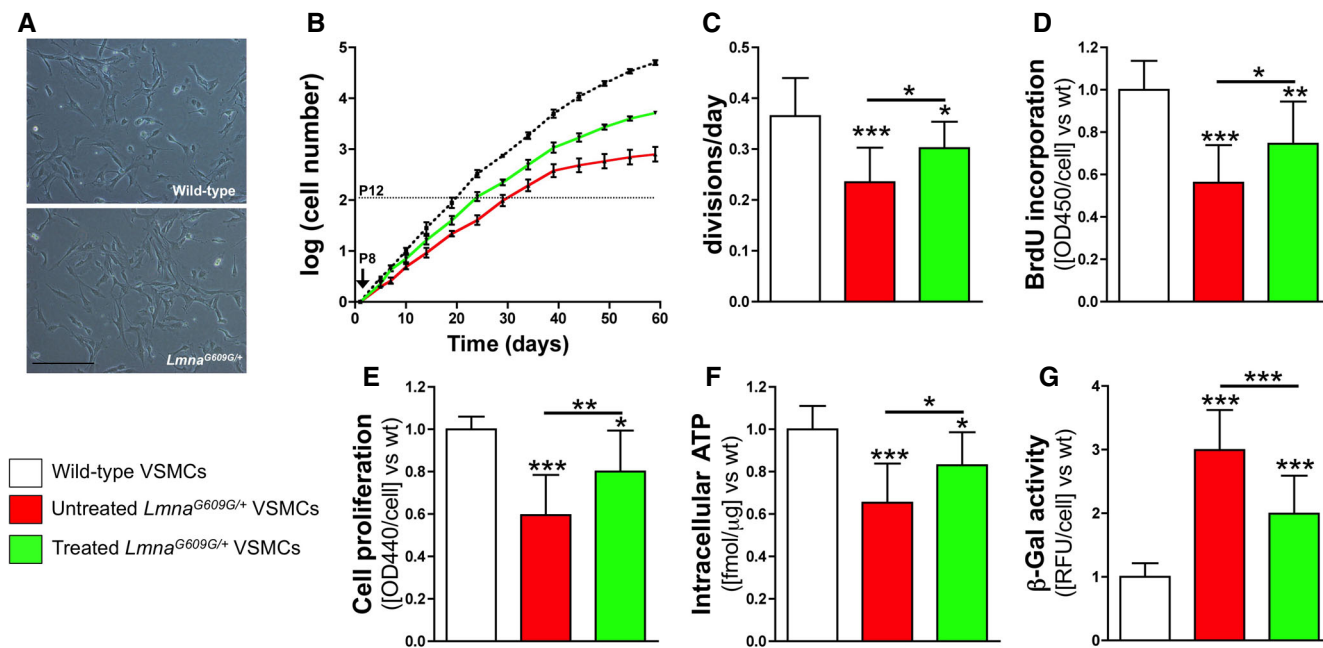

**Figure EV1. Magnesium improves *Lmna*<sup>G609G/+</sup> VSMC viability.**

VSMCs were incubated in MEM containing 10% FBS and 0.8 mM magnesium (wild-type and untreated *Lmna*<sup>G609G/+</sup> VSMCs) or 1.8 mM magnesium (treated *Lmna*<sup>G609G/+</sup> VSMCs) from passage 1 to passage 8 (P8).

- A Representative microscopy images (10x; scale bar: 100  $\mu$ m) of wild-type and *Lmna*<sup>G609G/+</sup> VSMCs at passage 10.  
 B Number of replicative cells at the indicated times. Cell count begins at passage 8 and ends after 60 days.  
 C Mean number of divisions per day over the first 30 days.  
 D Replicative incorporation of 5-bromodeoxyuridine (BrdU) into DNA.  
 E Cell viability measured using the cleavage of tetrazolium salt by cellular mitochondria dehydrogenases.  
 F Intracellular ATP content.  
 G  $\beta$ -galactosidase ( $\beta$ -Gal) activity.

Data information: Results are presented as the mean  $\pm$  SD of three independent experiments (four wells *per* experiment). One-way ANOVA and Tukey's multiple comparisons *post hoc* test were used for statistical analysis. \* $P < 0.05$ ; \*\* $P < 0.01$ ; \*\*\* $P < 0.001$ .

Source data are available online for this figure.

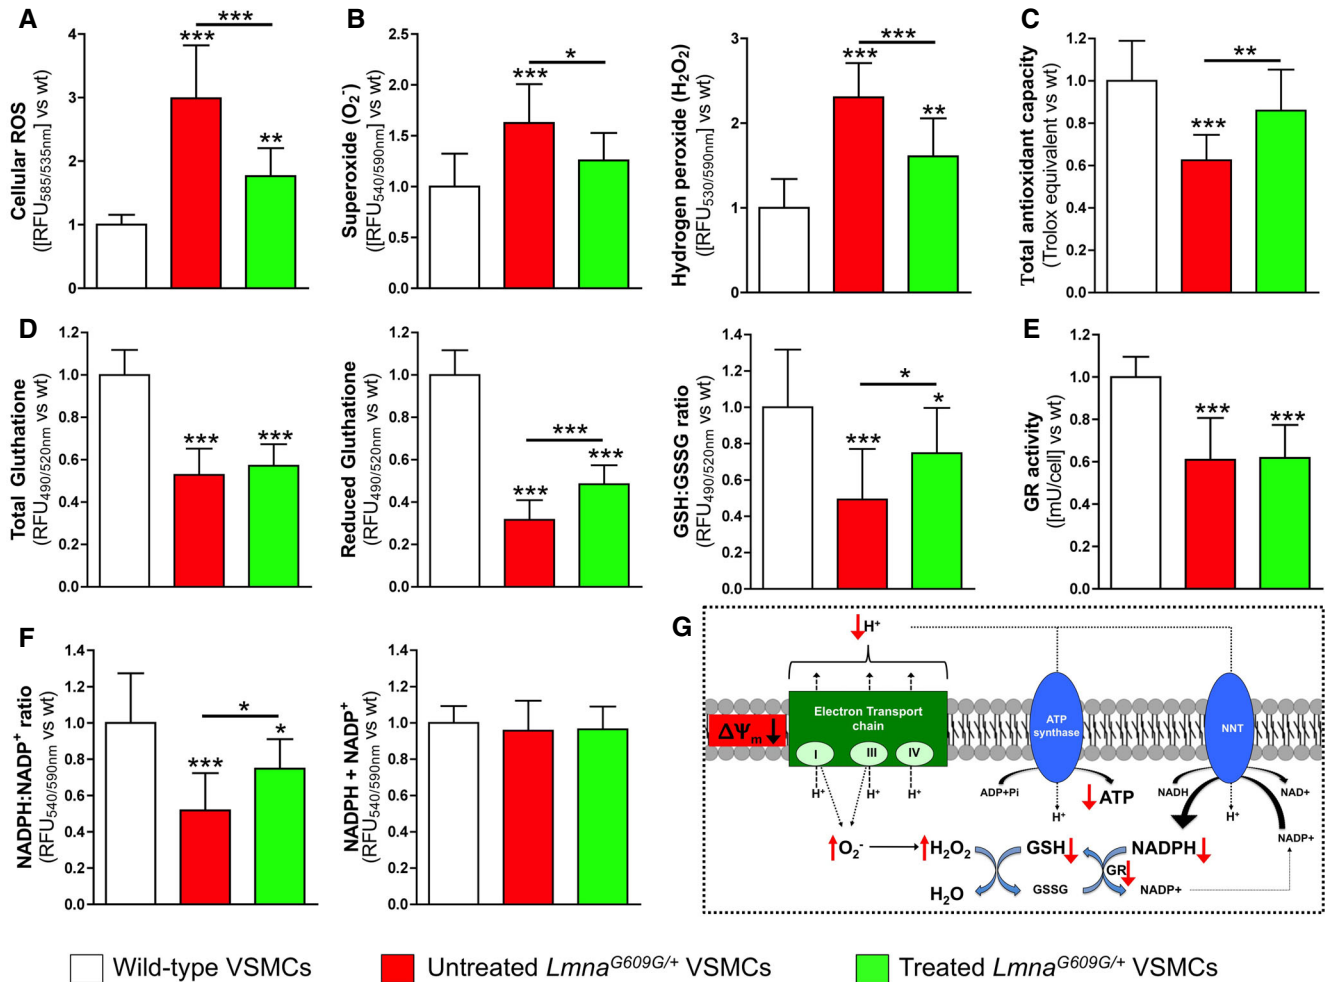

**Figure EV2. Magnesium ameliorates oxidative stress in *Lmna*<sup>G609G/+</sup> VSMCs.**

- A, B (A) Reactive oxygen species, and (B) superoxide and hydrogen peroxide radicals generated by the indicated VSMC types.  
 C, D (C) Total antioxidant capacity and (D) total glutathione (which includes reduced -GSH- and oxidized -GSSG- glutathione), reduced glutathione (GSH), and the ratio of reduced and oxidized glutathione (GSSG) in the indicated cell types.  
 E, F (E) Glutathione reductase (GR) activity, and (F) NADPH:NADP<sup>+</sup> ratio and total NADPH (NADPH + NADP<sup>+</sup>) in the indicated VSMC types.  
 G The boxed scheme shows the NADPH-coupled glutathione redox systems, H<sup>+</sup>-coupled ATP synthesis by mitochondrial ATP synthase, and H<sup>+</sup>-coupled synthesis of NADPH by mitochondrial NADPH transhydrogenase (NNT).  $\Delta\Psi_m$ : mitochondrial membrane potential.

Data information: Results are presented as the mean  $\pm$  SD of three independent experiments (four wells per experiment). One-way ANOVA and Tukey's multiple comparisons *post hoc* test were used for statistical analysis. \**P* < 0.05; \*\**P* < 0.01; \*\*\**P* < 0.001.

Source data are available online for this figure.

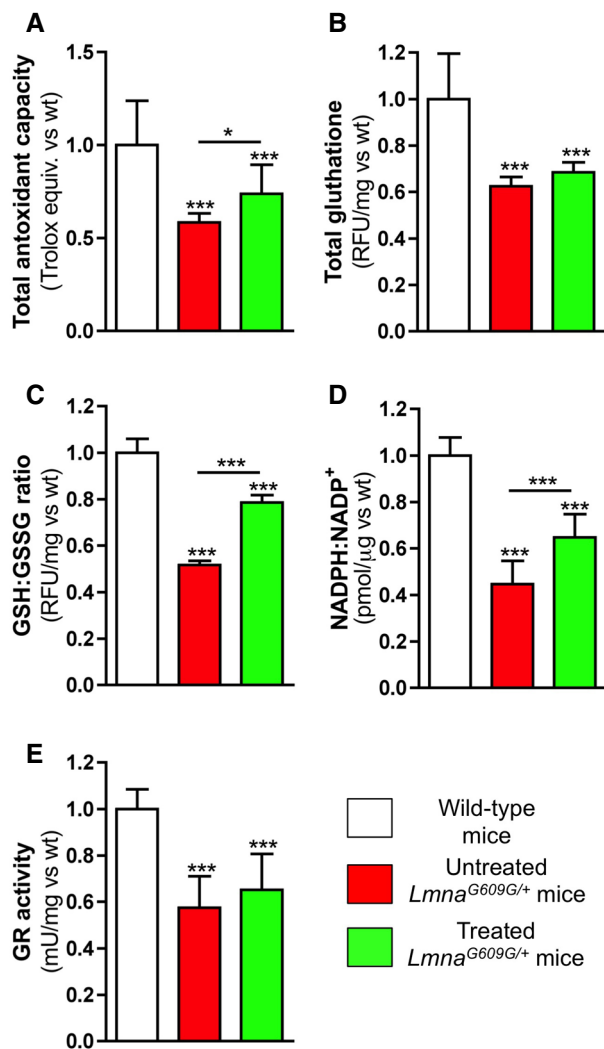

**Figure EV3. Magnesium improves the NADPH-coupled glutathione redox status in *Lmna*<sup>G609G/+</sup> mice.**

Liver homogenates were obtained from 34-week-old wild-type, untreated, or treated *Lmna*<sup>G609G/+</sup> mice.

A–C (A) Total antioxidant capacity, (B) total glutathione (which includes reduced and oxidized glutathione), and (C) the ratio of reduced (GSH) and oxidized (GSSG) in the indicated experimental mouse groups.

D, E (D) The NADPH:NADP<sup>+</sup> ratio and (E) glutathione reductase (GR) activity.

Data information: Results are presented as mean ± SD (*n* = 16). One-way ANOVA and Tukey's multiple comparisons *post hoc* test were used for statistical analysis. \**P* < 0.05; \*\*\**P* < 0.001.

Source data are available online for this figure.

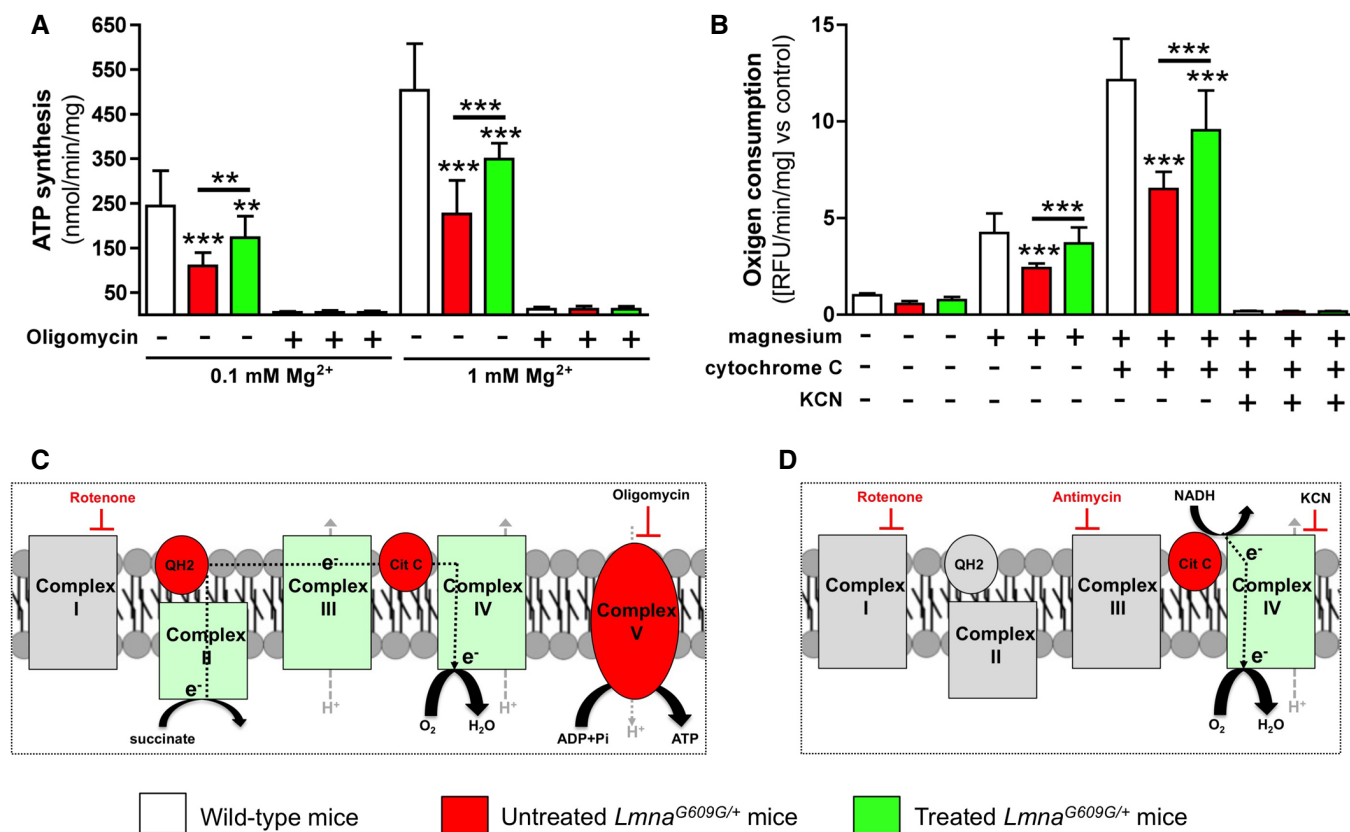

**Figure EV4. Magnesium increases the activity of mitochondrial ATP synthase and extramitochondrial NADH oxidation.**

- A** ATP synthase activity was measured in mitochondria isolated from the livers of 34-week-old wild-type, untreated, or treated *Lmna*<sup>G609G/+</sup> mice in media containing 0.1 mM magnesium or 1 mM magnesium. The isolated mitochondria were also incubated in the absence or presence of oligomycin (10 μg/ml). The incubation media contain 5 mM succinate and 2 μM rotenone. The isolated mitochondria were also incubated in the absence or presence of oligomycin (10 μM).
- B** Extramitochondrial NADH oxidation was measured in mitochondrial isolates from the livers of wild-type, untreated, or treated *Lmna*<sup>G609G/+</sup> mice in media containing rotenone (2 μM), antimycin A (10 μM), and NADH (1 mM/L). The isolated mitochondria were also incubated in the absence or presence of MgCl<sub>2</sub> (5 mM), cytochrome C (10 μM), or KCN (1 mM).
- C, D** The boxed scheme shows the five mitochondrial complexes involved in the electron transport chain and their known inhibitors used in the experiment.

Data information: Results are presented as mean ± SD (*n* = 16). One-way ANOVA and Tukey's multiple comparisons *post hoc* test were used for statistical analysis. \*\**p* < 0.01; \*\*\**p* < 0.001.

Source data are available online for this figure.
