# Supplementary material for: Dietary magnesium supplementation improves lifespan in a mouse model of progeria
Source: PubMed Central journal article supplement (PMC7539193; doi:10.15252/emmm.202012423), 2020-08-16
Supplement: EMMM-12-e12423-s006.pdf [file EMMM-12-e12423-s006.pdf]

**Fixed  
Untreated Lmna<sup>G609G/+</sup>VSMCs**

| 1     | 2      | 2      | 2     | 2     | mmol/L Pi |
|-------|--------|--------|-------|-------|-----------|
|       |        | Mg     | PPi   | PFA   |           |
| 3,791 | 85,536 | 70,977 | 5,961 | 2,683 |           |
| 4,340 | 66,696 | 73,470 | 7,225 | 3,249 |           |
| 3,487 | 45,797 | 59,190 | 5,421 | 4,632 |           |
| 3,486 | 59,409 | 61,091 | 5,582 | 4,540 |           |
| 3,190 | 52,953 | 67,668 | 4,768 | 5,234 |           |
| 4,906 | 74,336 | 58,433 | 6,014 | 6,019 |           |
| 2,213 | 58,409 | 54,571 | 5,726 | 5,454 |           |
| 3,058 | 52,124 | 53,600 | 4,897 | 4,699 |           |
| 2,812 | 46,451 | 58,893 | 5,774 | 5,580 |           |
| 2,486 | 54,438 | 49,022 | 3,871 | 5,592 |           |
| 3,343 | 46,395 | 43,539 | 4,193 | 6,562 |           |
| 3,255 | 55,477 | 57,048 | 5,212 | 6,128 |           |

**Fixed  
treated Lmna<sup>G609G/+</sup>VSMCs**

| 1     | 2      | 2       | 2     | 2      | mmol/L Pi |
|-------|--------|---------|-------|--------|-----------|
|       |        | Mg      | PPi   | PFA    |           |
| 3,841 | 71,029 | 69,427  | 7,409 | 3,817  |           |
| 3,773 | 90,200 | 47,985  | 6,373 | 4,851  |           |
| 3,697 | 53,544 | 47,016  | 4,330 | 4,308  |           |
| 3,393 | 57,832 | 103,171 | 5,434 | 3,083  |           |
| 3,378 | 49,900 | 90,674  | 5,741 | 5,561  |           |
| 2,734 | 75,431 | 53,612  | 6,149 | 4,862  |           |
| 4,197 | 66,367 | 77,723  | 4,618 | 6,311  |           |
| 3,058 | 52,124 | 60,262  | 4,897 | 6,222  |           |
| 3,905 | 50,192 | 45,538  | 5,259 | 9,225  |           |
| 2,953 | 70,245 | 56,230  | 4,975 | 6,454  |           |
| 2,657 | 41,742 | 65,002  | 5,004 | 10,227 |           |
| 3,584 | 61,087 | 62,817  | 5,740 | 8,338  |           |

**Living  
Untreated Lmna<sup>G609G/+</sup>VSMCs**

| 1     | 2      | 2      | 2     | 2     | mmol/L Pi |
|-------|--------|--------|-------|-------|-----------|
|       |        | Mg     | PPi   | PFA   |           |
| 3,083 | 40,227 | 31,855 | 8,575 | 3,485 |           |
| 4,034 | 56,500 | 29,486 | 5,861 | 4,187 |           |
| 4,741 | 33,567 | 19,266 | 4,211 | 5,347 |           |
| 3,558 | 39,088 | 24,182 | 5,594 | 3,670 |           |
| 2,364 | 31,894 | 21,112 | 4,468 | 4,830 |           |
| 5,449 | 42,551 | 16,049 | 7,542 | 2,979 |           |
| 2,095 | 34,413 | 30,184 | 3,569 | 4,376 |           |
| 2,939 | 32,294 | 19,979 | 4,622 | 3,950 |           |
| 4,860 | 51,349 | 21,791 | 4,427 | 6,014 |           |
| 2,463 | 30,184 | 27,813 | 5,134 | 4,243 |           |
| 3,222 | 34,328 | 22,074 | 7,020 | 5,929 |           |
| 3,972 | 43,641 | 26,999 | 6,245 | 5,660 |           |

**Living  
treated Lmna<sup>G609G/+</sup>VSMCs**

| 1     | 2      | 2      | 2     | 2     | mmol/L Pi |
|-------|--------|--------|-------|-------|-----------|
|       |        | Mg     | PPi   | PFA   |           |
| 3,762 | 32,686 | 12,959 | 3,362 | 3,331 |           |
| 4,049 | 7,696  | 20,194 | 4,278 | 4,233 |           |
| 2,970 | 38,264 | 2,573  | 9,312 | 3,760 |           |
| 3,234 | 23,594 | 14,597 | 5,085 | 2,691 |           |
| 1,767 | 16,043 | 5,415  | 8,275 | 4,448 |           |
| 4,076 | 35,009 | 8,685  | 0,971 | 3,889 |           |
| 3,164 | 14,655 | 3,208  | 4,916 | 5,049 |           |
| 2,672 | 19,493 | 12,060 | 4,201 | 4,977 |           |
| 1,613 | 19,468 | 16,818 | 7,919 | 8,510 |           |
| 3,260 | 18,947 | 13,509 | 3,515 | 5,954 |           |
| 4,714 | 31,519 | 12,939 | 3,640 | 9,434 |           |
| 3,611 | 26,342 | 16,297 | 5,678 | 7,692 |           |
