# Supplementary material for: Dietary magnesium supplementation improves lifespan in a mouse model of progeria
Source: PubMed Central journal article supplement (PMC7539193; doi:10.15252/emmm.202012423), 2020-08-16
Supplement: EMMM-12-e12423-s008.pdf [file EMMM-12-e12423-s008.pdf]

| Complex I |                                             |                                           | Complex II |                                             |                                           |
|-----------|---------------------------------------------|-------------------------------------------|------------|---------------------------------------------|-------------------------------------------|
| wild-type | untreated<br><i>Lmna</i> <sup>G609G/+</sup> | treated<br><i>Lmna</i> <sup>G609G/+</sup> | wild-type  | untreated<br><i>Lmna</i> <sup>G609G/+</sup> | treated<br><i>Lmna</i> <sup>G609G/+</sup> |
| 0,984     | 0,464                                       | 0,846                                     | 1,149      | 0,987                                       | 0,886                                     |
| 0,876     | 0,644                                       | 0,924                                     | 1,250      | 0,702                                       | 1,073                                     |
| 1,100     | 0,653                                       | 0,834                                     | 1,203      | 0,998                                       | 1,192                                     |
| 1,233     | 0,808                                       | 0,748                                     | 0,929      | 0,994                                       | 1,196                                     |
| 1,229     | 0,722                                       | 0,795                                     | 1,134      | 1,174                                       | 0,940                                     |
| 0,980     | 0,752                                       | 0,962                                     | 0,987      | 0,796                                       | 1,221                                     |
| 1,319     | 0,571                                       | 0,859                                     | 0,763      | 0,681                                       | 1,091                                     |
| 1,147     | 0,503                                       | 0,911                                     | 0,724      | 0,947                                       | 0,933                                     |
| 0,971     | 0,550                                       | 0,864                                     | 1,149      | 1,008                                       | 0,907                                     |
| 0,932     | 0,623                                       | 0,911                                     | 1,124      | 0,717                                       | 1,012                                     |
| 1,040     | 0,597                                       | 0,898                                     | 1,001      | 1,030                                       | 1,178                                     |
| 1,233     | 0,589                                       | 0,696                                     | 0,954      | 1,044                                       | 1,221                                     |
| 0,748     | 0,597                                       | 0,872                                     | 1,120      | 1,181                                       | 0,954                                     |
| 0,649     | 0,636                                       | 0,799                                     | 1,026      | 0,792                                       | 0,969                                     |
| 0,687     | 0,589                                       | 0,855                                     | 0,760      | 0,666                                       | 1,167                                     |
| 0,872     | 0,576                                       | 0,679                                     | 0,727      | 1,066                                       | 1,102                                     |

| Complex III |                                             |                                           | Complex IV |                                             |                                           |
|-------------|---------------------------------------------|-------------------------------------------|------------|---------------------------------------------|-------------------------------------------|
| wild-type   | untreated<br><i>Lmna</i> <sup>G609G/+</sup> | treated<br><i>Lmna</i> <sup>G609G/+</sup> | wild-type  | untreated<br><i>Lmna</i> <sup>G609G/+</sup> | treated<br><i>Lmna</i> <sup>G609G/+</sup> |
| 0,783       | 0,903                                       | 0,808                                     | 1,005      | 0,314                                       | 0,560                                     |
| 0,778       | 0,907                                       | 0,813                                     | 1,027      | 0,314                                       | 0,560                                     |
| 0,950       | 0,740                                       | 0,804                                     | 1,251      | 0,396                                       | 0,795                                     |
| 0,976       | 0,671                                       | 0,826                                     | 1,237      | 0,399                                       | 0,802                                     |
| 1,217       | 0,722                                       | 1,131                                     | 0,759      | 0,417                                       | 0,873                                     |
| 1,256       | 0,679                                       | 1,178                                     | 0,738      | 0,428                                       | 0,884                                     |
| 0,778       | 0,688                                       | 0,705                                     | 0,838      | 0,560                                       | 0,702                                     |
| 0,757       | 0,718                                       | 0,684                                     | 0,841      | 0,631                                       | 0,652                                     |
| 0,950       | 0,619                                       | 1,041                                     | 1,030      | 0,332                                       | 0,556                                     |
| 0,955       | 0,572                                       | 1,062                                     | 1,059      | 0,335                                       | 0,563                                     |
| 0,972       | 1,088                                       | 0,735                                     | 1,280      | 0,485                                       | 0,784                                     |
| 0,950       | 1,049                                       | 0,654                                     | 1,273      | 0,485                                       | 0,795                                     |
| 0,959       | 0,568                                       | 0,838                                     | 0,952      | 0,410                                       | 0,948                                     |
| 0,933       | 0,546                                       | 0,791                                     | 0,930      | 0,428                                       | 0,952                                     |
| 1,397       | 0,533                                       | 0,869                                     | 0,881      | 0,624                                       | 0,727                                     |
| 1,393       | 0,512                                       | 0,929                                     | 0,898      | 0,720                                       | 0,695                                     |

| Complex V |                                             |                                           | Intracellular ATP |                                             |                                           |
|-----------|---------------------------------------------|-------------------------------------------|-------------------|---------------------------------------------|-------------------------------------------|
| wild-type | untreated<br><i>Lmna</i> <sup>G609G/+</sup> | treated<br><i>Lmna</i> <sup>G609G/+</sup> | wild-type         | untreated<br><i>Lmna</i> <sup>G609G/+</sup> | treated<br><i>Lmna</i> <sup>G609G/+</sup> |
| 0,906     | 0,384                                       | 0,845                                     | 0,552             | 0,441                                       | 0,673                                     |
| 0,869     | 0,358                                       | 1,319                                     | 0,649             | 0,439                                       | 0,660                                     |
| 0,885     | 0,638                                       | 0,695                                     | 0,891             | 0,434                                       | 0,721                                     |
| 0,917     | 0,642                                       | 0,636                                     | 0,888             | 0,425                                       | 0,705                                     |
| 0,915     | 0,684                                       | 0,771                                     | 1,437             | 0,606                                       | 1,117                                     |
| 0,891     | 0,660                                       | 0,793                                     | 1,431             | 0,608                                       | 1,109                                     |
| 1,051     | 0,747                                       | 0,686                                     | 1,135             | 0,384                                       | 0,576                                     |
| 1,040     | 0,786                                       | 0,762                                     | 1,098             | 0,370                                       | 0,597                                     |
| 1,064     | 0,459                                       | 1,057                                     | 1,015             | 0,398                                       | 0,613                                     |
| 1,024     | 0,428                                       | 1,107                                     | 0,542             | 0,398                                       | 0,601                                     |
| 1,055     | 0,723                                       | 0,793                                     | 0,829             | 0,402                                       | 0,597                                     |
| 1,044     | 0,721                                       | 0,721                                     | 0,827             | 0,391                                       | 0,633                                     |
| 1,011     | 0,767                                       | 0,876                                     | 1,313             | 0,596                                       | 1,069                                     |
| 0,974     | 0,723                                       | 0,902                                     | 1,300             | 0,601                                       | 1,060                                     |
| 1,164     | 0,813                                       | 0,771                                     | 1,060             | 0,348                                       | 0,549                                     |
| 1,188     | 0,848                                       | 0,856                                     | 1,031             | 0,337                                       | 0,563                                     |

| Mitochondrial calcium |                                             |                                           | Mitochondrial magnesium |                                             |                                           |
|-----------------------|---------------------------------------------|-------------------------------------------|-------------------------|---------------------------------------------|-------------------------------------------|
| wild-type             | untreated<br><i>Lmna</i> <sup>G609G/+</sup> | treated<br><i>Lmna</i> <sup>G609G/+</sup> | wild-type               | untreated<br><i>Lmna</i> <sup>G609G/+</sup> | treated<br><i>Lmna</i> <sup>G609G/+</sup> |
| 0,775                 | 1,593                                       | 0,885                                     | 1,049                   | 0,798                                       | 1,037                                     |
| 0,800                 | 1,603                                       | 1,650                                     | 1,122                   | 0,769                                       | 1,043                                     |
| 1,016                 | 1,547                                       | 1,349                                     | 0,741                   | 1,102                                       | 1,514                                     |
| 1,169                 | 1,957                                       | 1,075                                     | 1,045                   | 0,526                                       | 0,902                                     |
| 1,205                 | 1,905                                       | 1,591                                     | 1,127                   | 0,825                                       | 0,823                                     |
| 0,981                 | 1,284                                       | 0,895                                     | 0,985                   | 0,601                                       | 0,648                                     |
| 0,736                 | 1,260                                       | 0,939                                     | 0,999                   | 0,591                                       | 1,097                                     |
| 1,331                 | 2,177                                       | 0,971                                     | 0,899                   | 0,516                                       | 1,032                                     |
| 1,318                 | 1,641                                       | 1,614                                     | 0,849                   | 0,483                                       | 0,720                                     |
| 0,910                 | 2,463                                       | 1,464                                     | 0,981                   | 0,578                                       | 0,957                                     |
| 0,639                 | 1,966                                       | 1,554                                     | 1,261                   | 0,608                                       | 0,765                                     |
| 0,709                 | 1,791                                       | 0,661                                     | 0,929                   | 0,806                                       | 0,566                                     |
| 1,069                 | 2,754                                       | 1,346                                     | 0,750                   | 0,512                                       | 0,594                                     |
| 1,075                 | 2,119                                       | 0,908                                     | 1,241                   | 0,724                                       | 0,592                                     |
| 1,245                 | 1,781                                       | 1,365                                     | 1,203                   | 0,558                                       | 1,243                                     |
| 1,021                 | 2,403                                       | 1,694                                     | 0,817                   | 0,601                                       | 0,758                                     |
